# Supplementary material
Source: ML conference proceedings conference paper supplement (https://openreview.net/forum?id=DBs6SA_fKb)
Supplement: supplementary_material [file attachment]

- 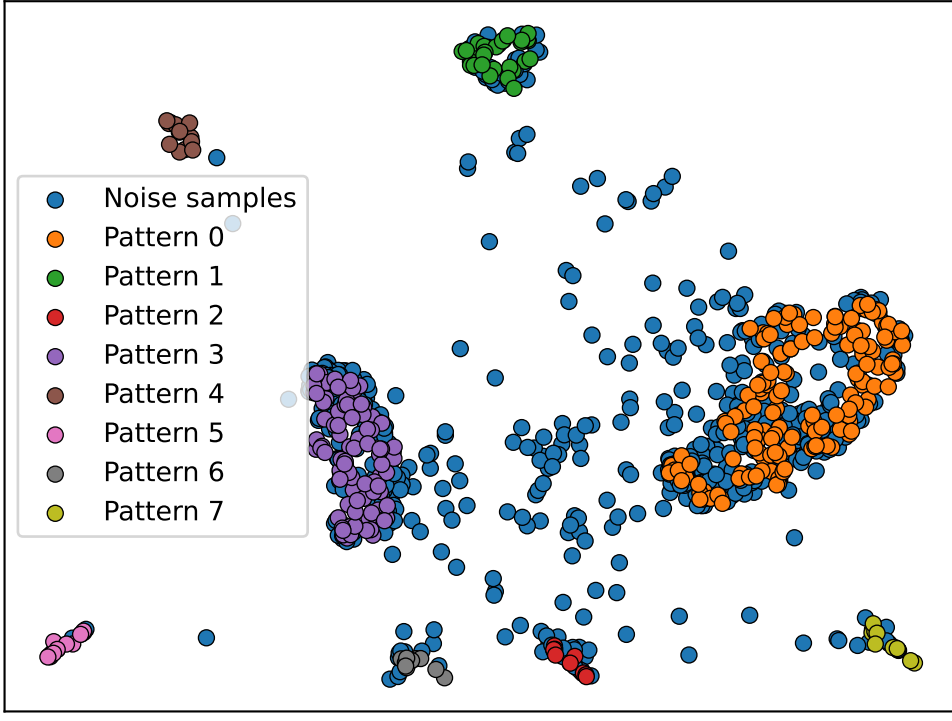
- A scatter plot showing data points categorized into noise samples and eight different patterns. The plot is enclosed in a black rectangular frame. The data points are represented by colored circles with black outlines. The categories are: Noise samples (blue), Pattern 0 (orange), Pattern 1 (green), Pattern 2 (red), Pattern 3 (purple), Pattern 4 (brown), Pattern 5 (pink), Pattern 6 (grey), and Pattern 7 (yellow-green). The noise samples are scattered throughout the plot, often surrounding the clusters of the patterns. The patterns themselves form distinct clusters: Pattern 0 is a large cluster on the right; Pattern 1 is a small cluster at the top center; Pattern 2 is a small cluster at the bottom center; Pattern 3 is a large cluster on the left; Pattern 4 is a small cluster at the top left; Pattern 5 is a small cluster at the bottom left; Pattern 6 is a small cluster at the bottom center-left; and Pattern 7 is a small cluster at the bottom right. A legend box is located on the left side of the plot, containing the color-coded labels.
- Noise samples
  - Pattern 0
  - Pattern 1
  - Pattern 2
  - Pattern 3
  - Pattern 4
  - Pattern 5
  - Pattern 6
  - Pattern 7
