# Supplementary material
Source: ML conference proceedings conference paper supplement (https://openreview.net/forum?id=DBs6SA_fKb)

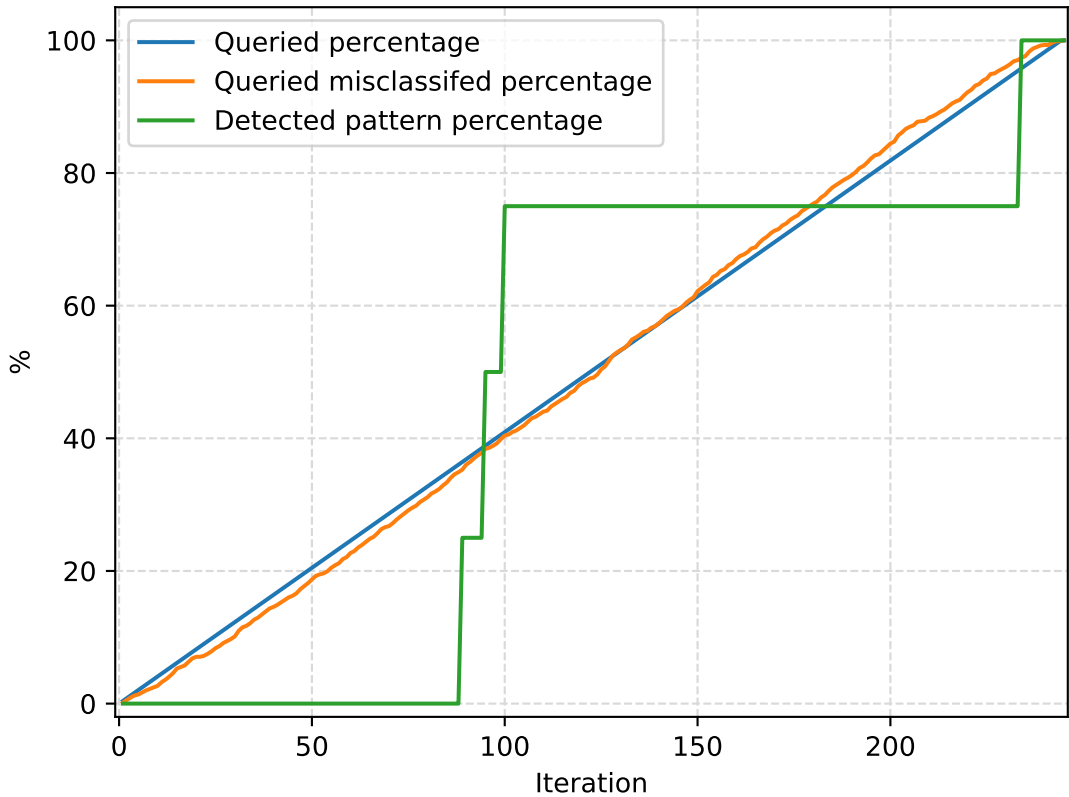

Supplement: supplementary_material [file attachment]

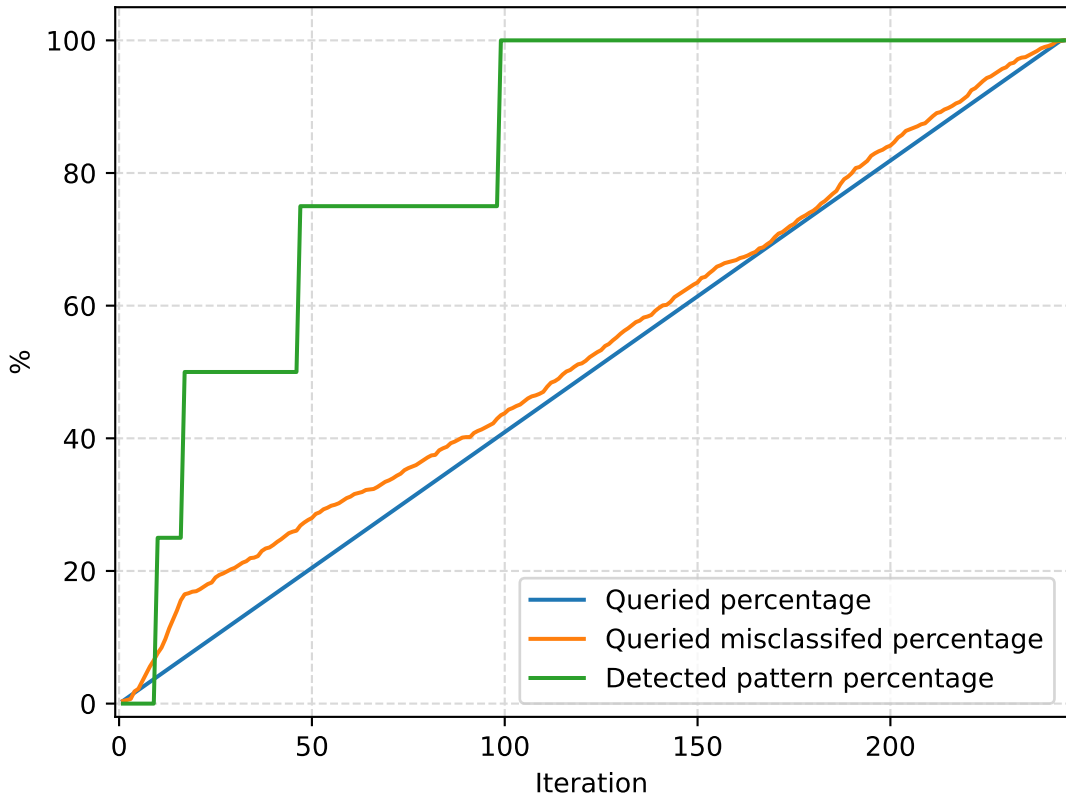

Supplement: supplementary_material [file attachment]

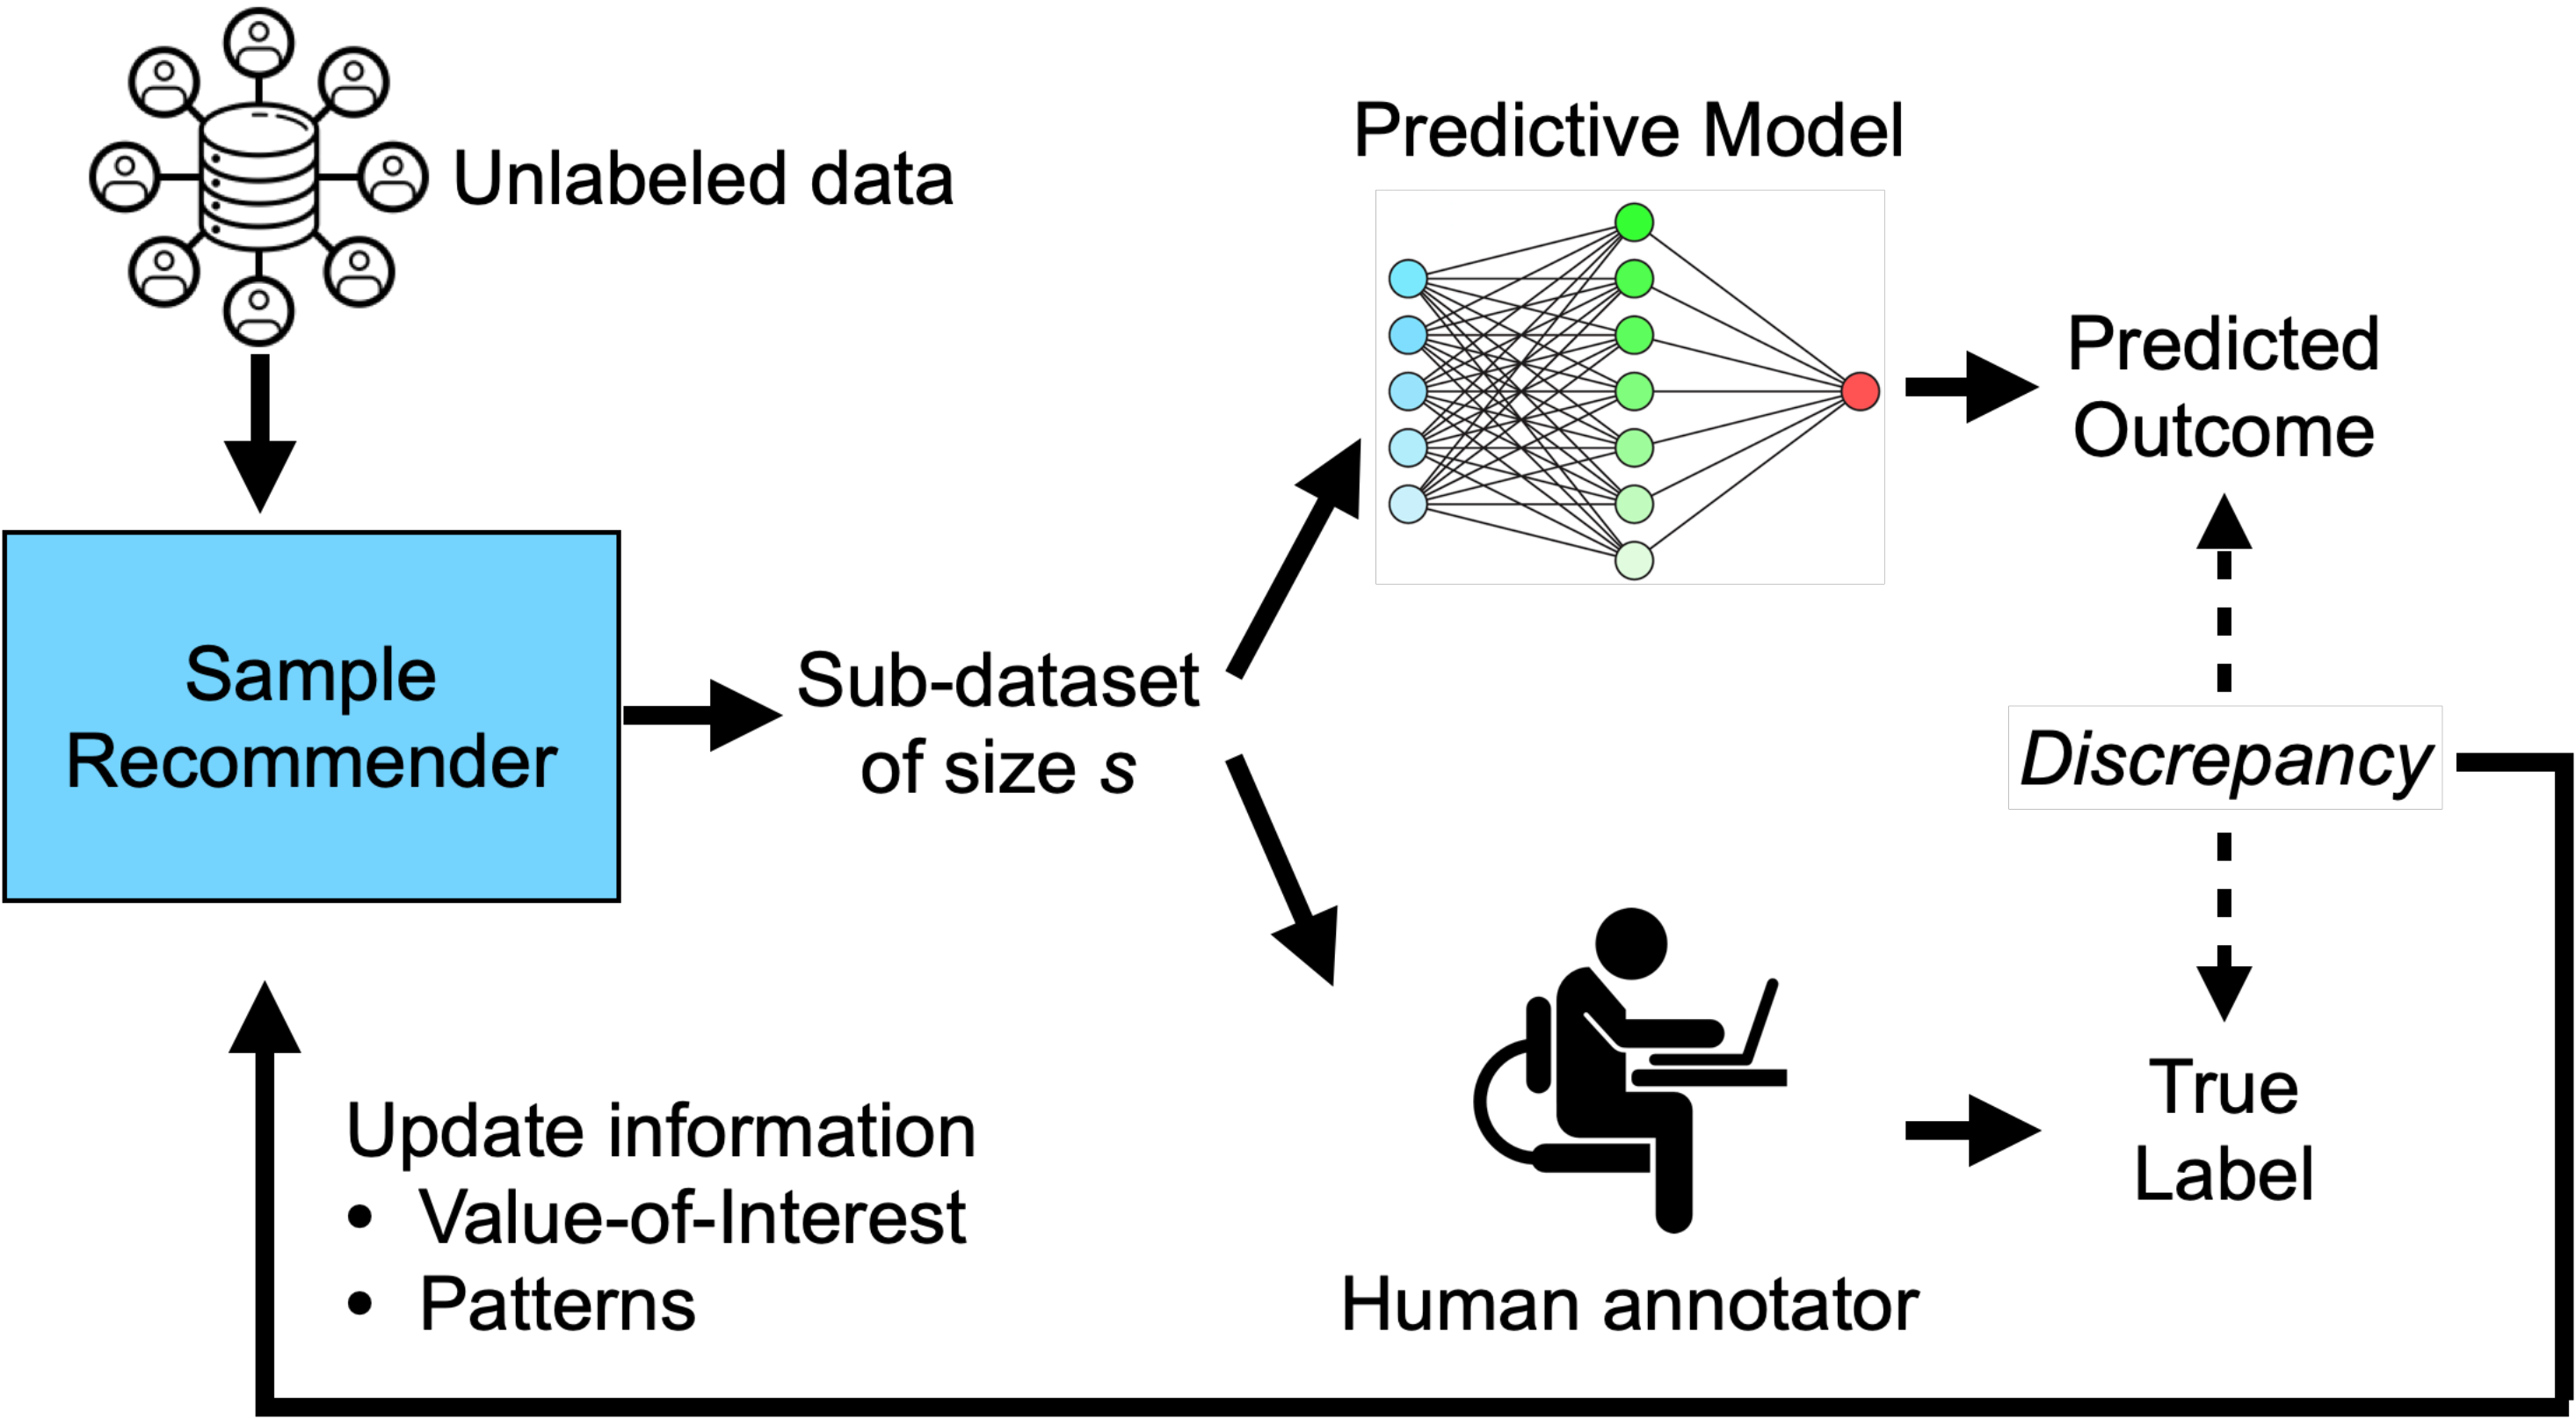

Supplement: supplementary_material [file attachment]

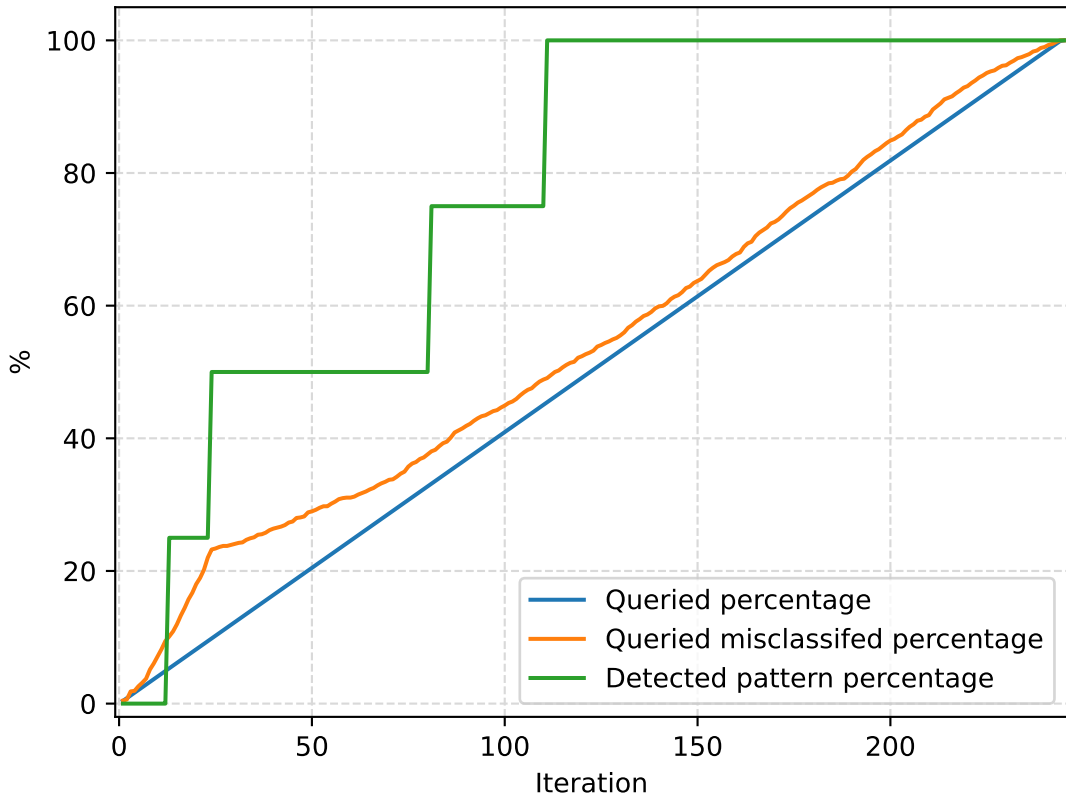

Supplement: supplementary_material [file attachment]

- Noise samples
- Pattern 0
- Pattern 1
- Pattern 2
- Pattern 3
- Pattern 4
- Pattern 5

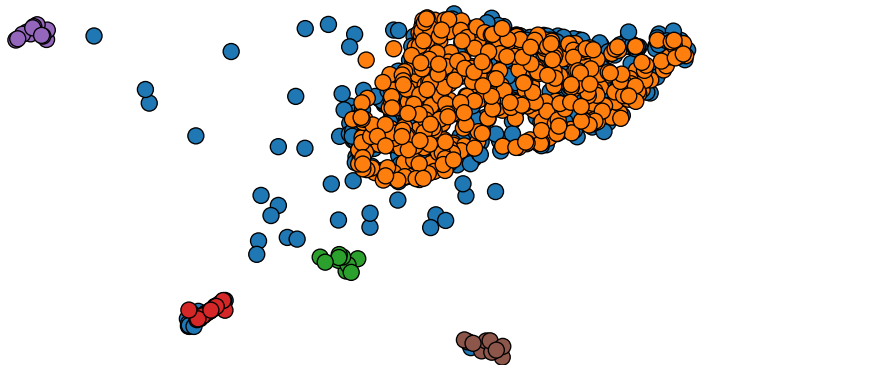

Supplement: supplementary_material [file attachment]

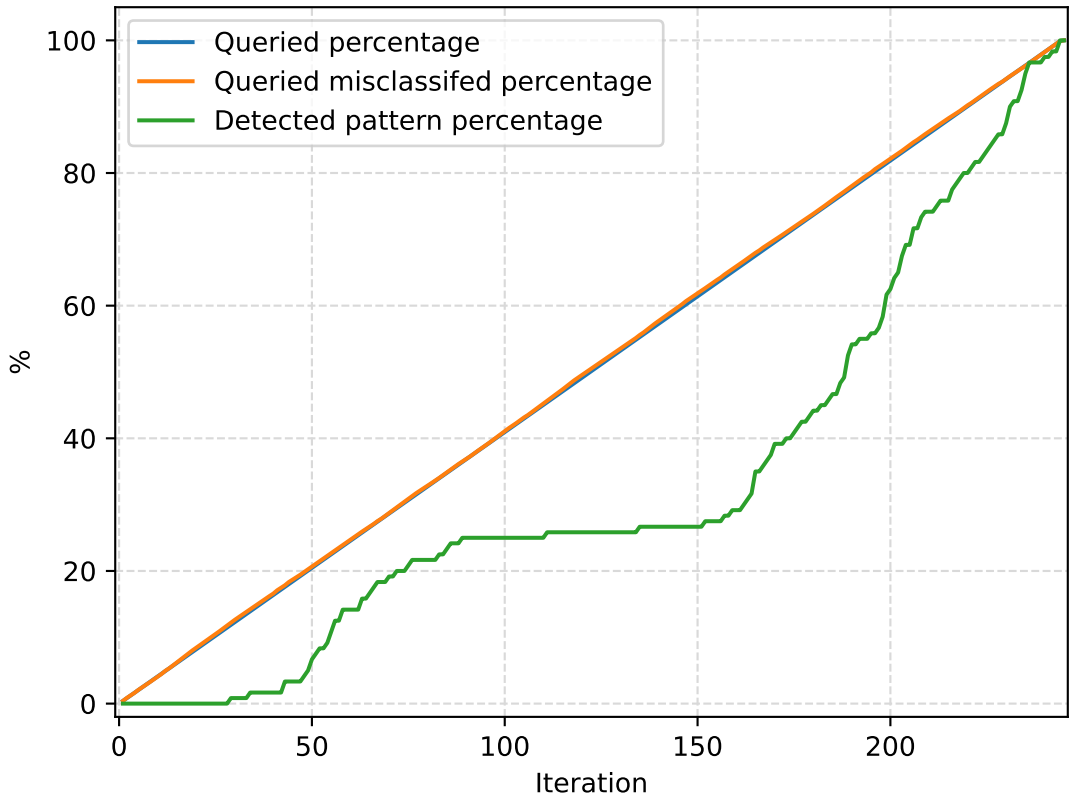

Supplement: supplementary_material [file attachment]

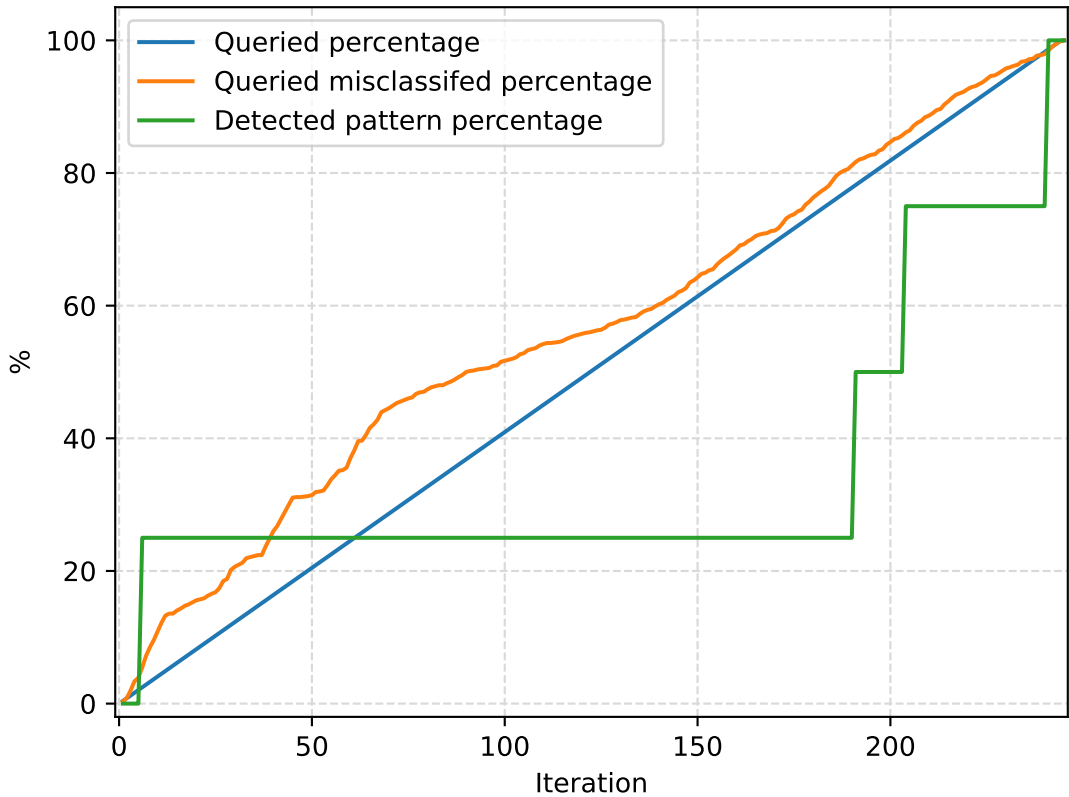

Supplement: supplementary_material [file attachment]

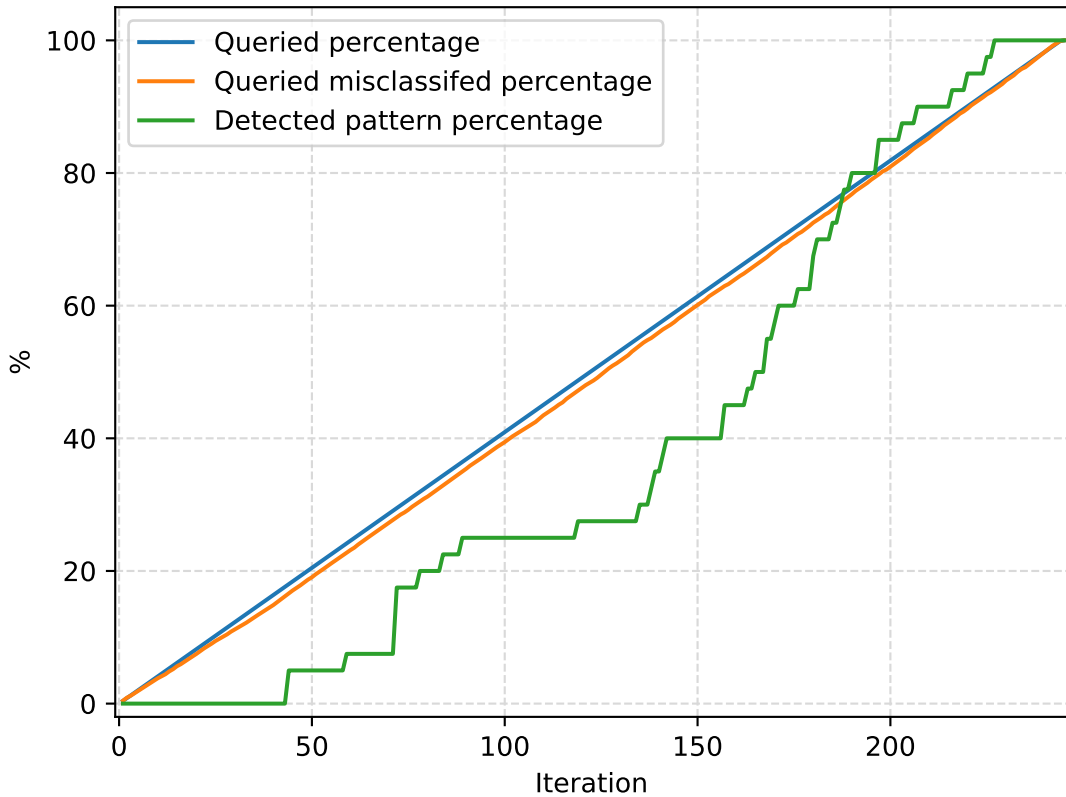

Supplement: supplementary_material [file attachment]

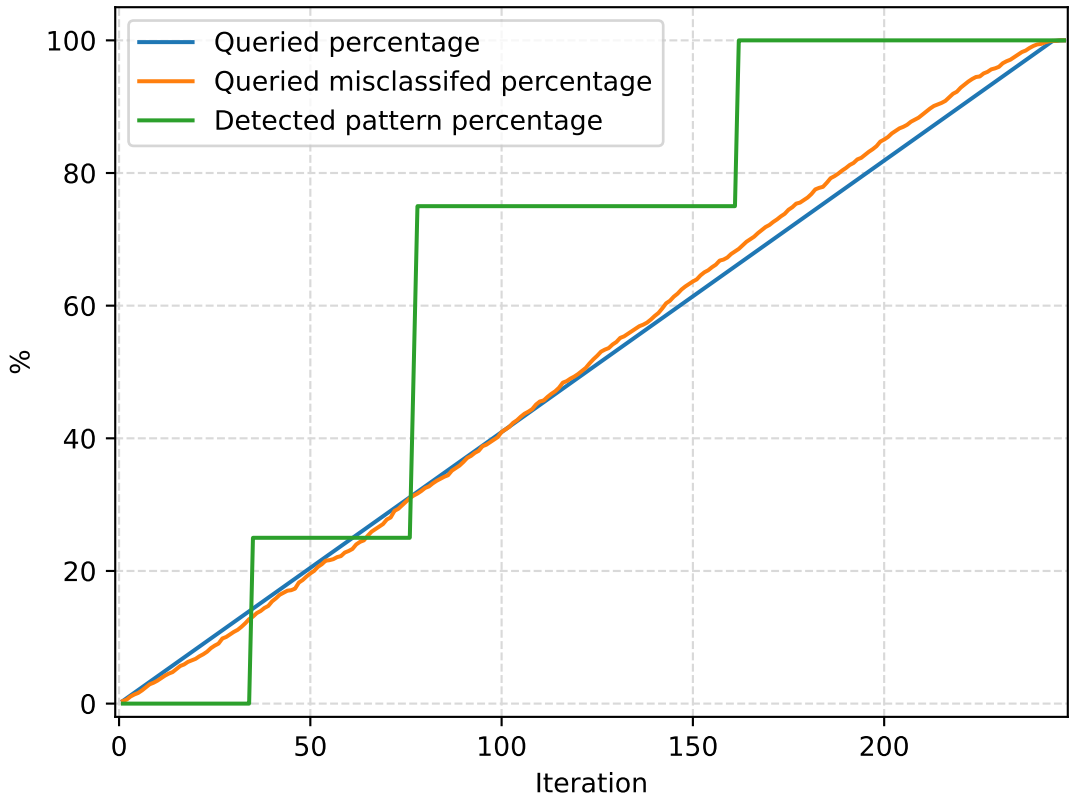

Supplement: supplementary_material [file attachment]

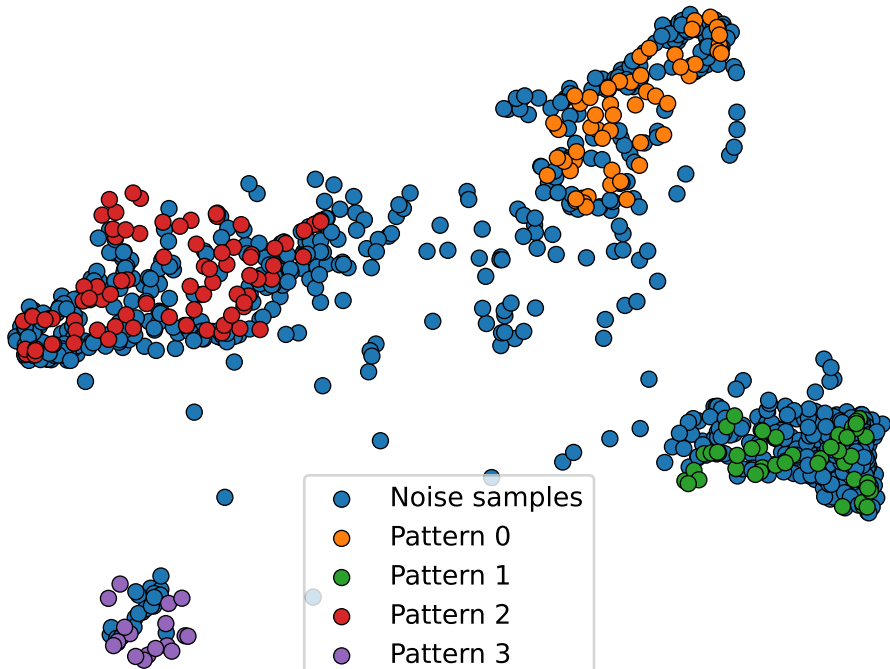

Supplement: supplementary_material [file attachment]

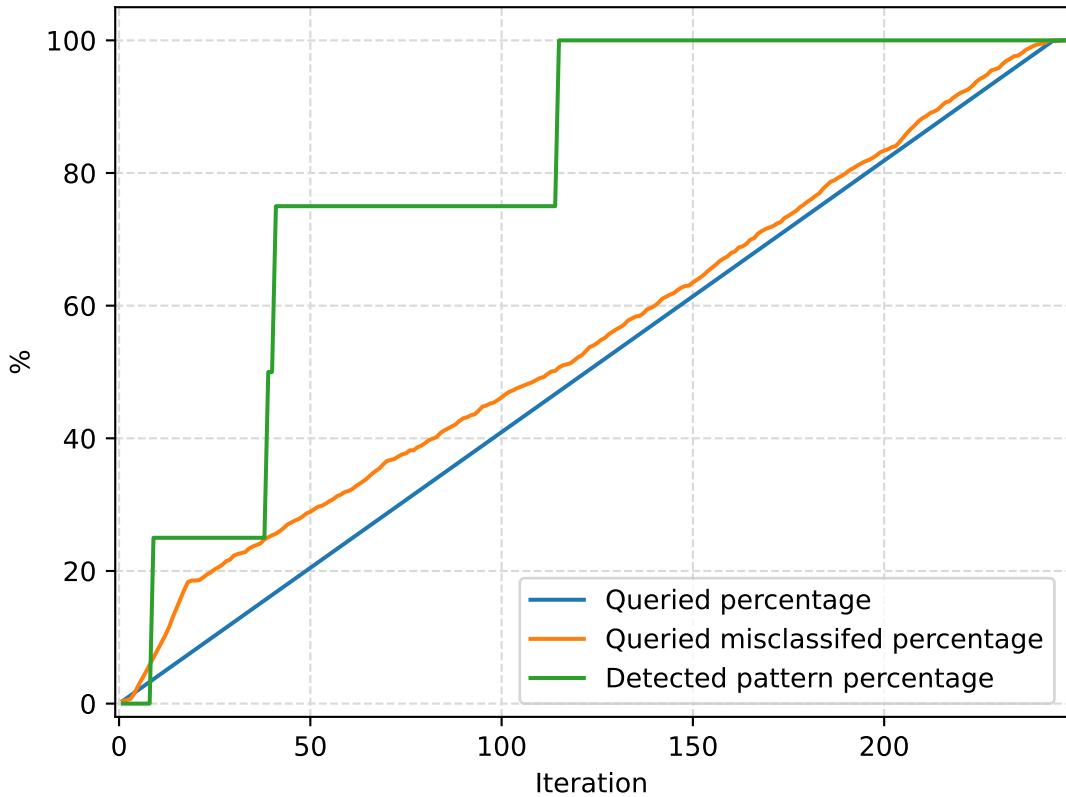

Supplement: supplementary_material [file attachment]

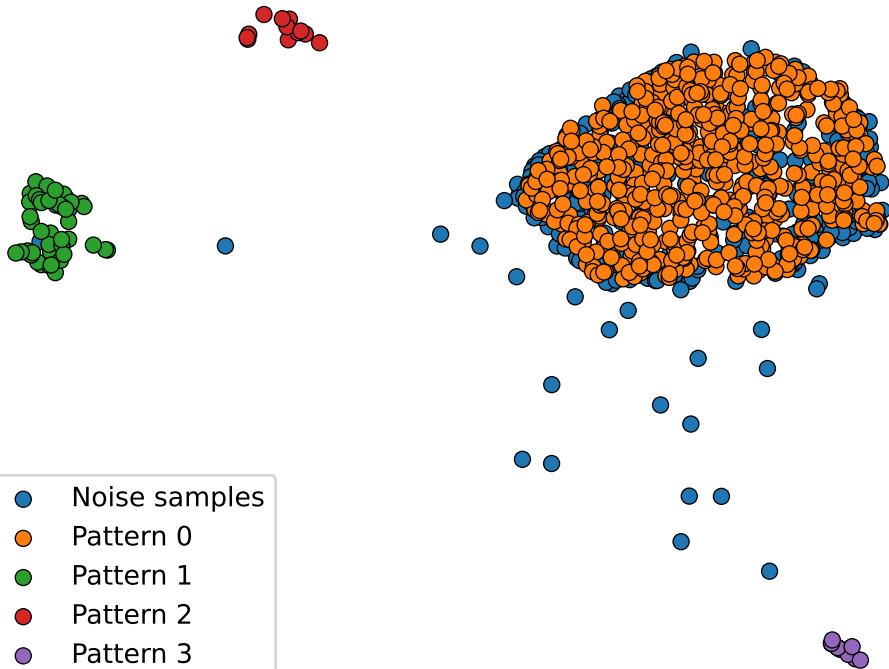

Supplement: supplementary_material [file attachment]
